# Supplementary material for: Cytometry TOF identifies alveolar macrophage subtypes in acute respiratory distress syndrome
Source: JCI journal article supplement (doi:10.1172/jci.insight.99281), 2018-05-16
Supplement: sd1 [file 1]

# **Cytometry Time-of-Flight Identifies Alveolar Macrophage Subtypes in Acute Respiratory Distress Syndrome**

Eric D. Morrell<sup>1</sup>, Alice Wiedeman<sup>2</sup>, S. Alice Long<sup>2</sup>, Sina A. Gharib<sup>1</sup>, T. Eoin West<sup>1</sup>, Shawn J. Skerrett<sup>1</sup>, Mark M. Wurfel<sup>1\*</sup>, Carmen Mikacenic<sup>1\*</sup>

<sup>1</sup>Division of Pulmonary, Critical Care, and Sleep Medicine, Department of Medicine, University of Washington, Seattle, Washington, United States of America.

<sup>2</sup>Translational Research Program, Benaroya Research Institute at Virginia Mason, Seattle, Washington, United States of America.

Supplemental Data

## Supplemental Figures

Figure S1.

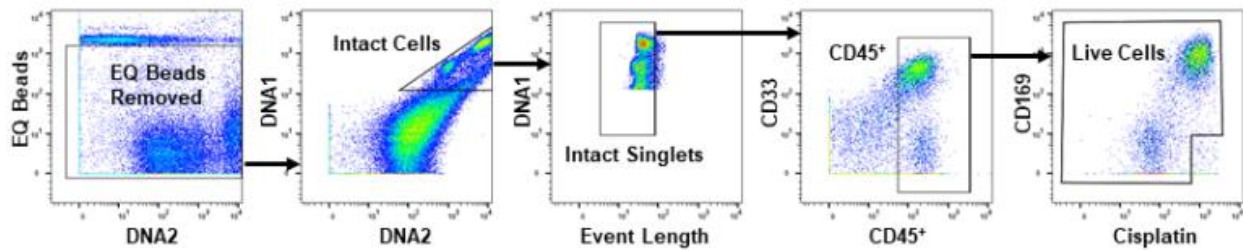

### Initial Gating to Isolate Intact/Singlet/Live/CD45<sup>+</sup> Cells for Downstream Analysis.

Normalization beads were excluded, and then intact cells were identified by gating on events with strong staining for the two isotopes of Ir intercalator. Further gating on the Event\_Length parameter removed cell aggregates. Non-leukocytes and dead cells were eliminated with CD45 and cisplatin gating, respectively.

Figure S2.

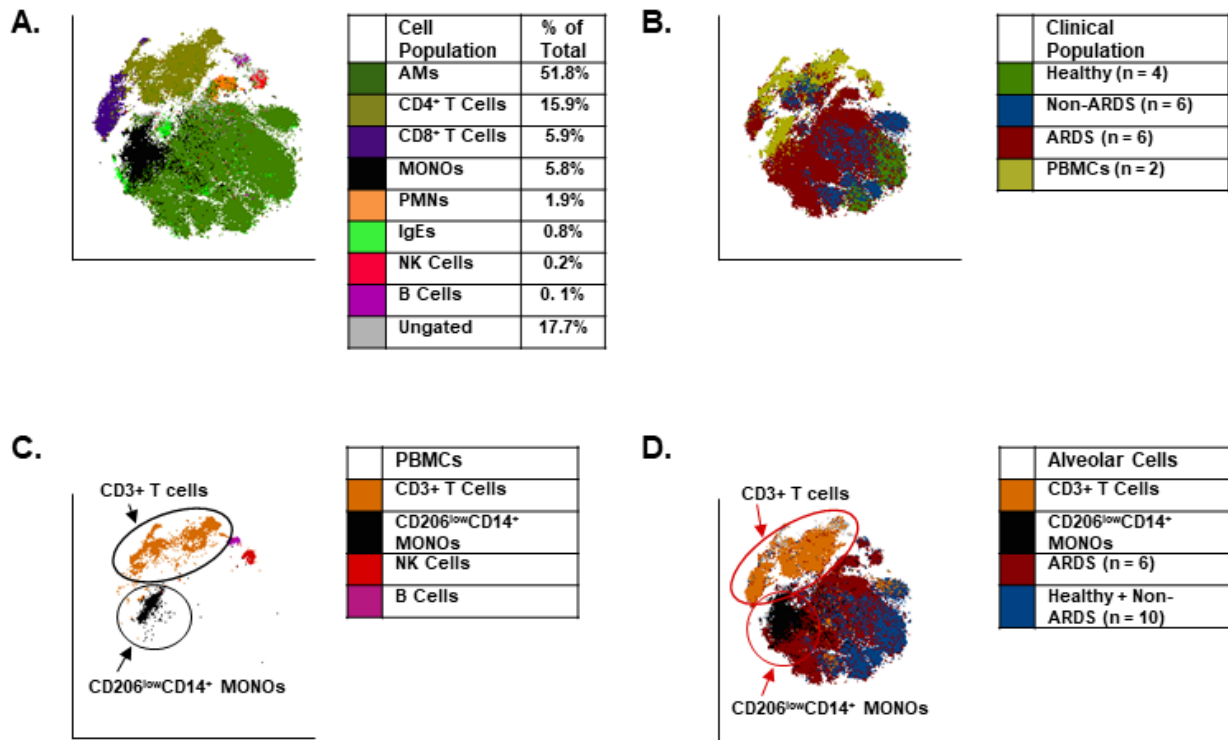

**CyTOF Analysis of Leukocytes from Both Bronchoalveolar Lavage (BAL) Fluid and Peripheral Blood Mononuclear Cell (PBMC) Sample Sources.** We combined equally sampled events from 2 PBMC samples obtained from healthy volunteers to our 16 HMC-BAL alveolar samples, and analyzed all events within a single viSNE plot. A) Concatenated viSNE plot generated from all 18 samples. The color of each dot represents its immune cell subset as designated by manual gating shown in Figure 1A. B) Concatenated viSNE plot of all cells colored per the clinical population from which the sample was procured. C) Concatenated viSNE plot of all cells with only PBMCs displayed. D) Concatenated viSNE plot of all cells with only alveolar cells displayed. CD3<sup>+</sup> T cells and CD206<sup>low</sup>/CD14<sup>+</sup> MONOs from either the PBMCs or alveolar samples were phenotypically similar based on their respective cluster designations within the overall viSNE plot. AM = alveolar macrophage, IgE = eosinophil, basophil, and mast cells, MONO = monocyte, NK = natural killer cell, PMN = neutrophil, UNK = unclassified

Figure S3.

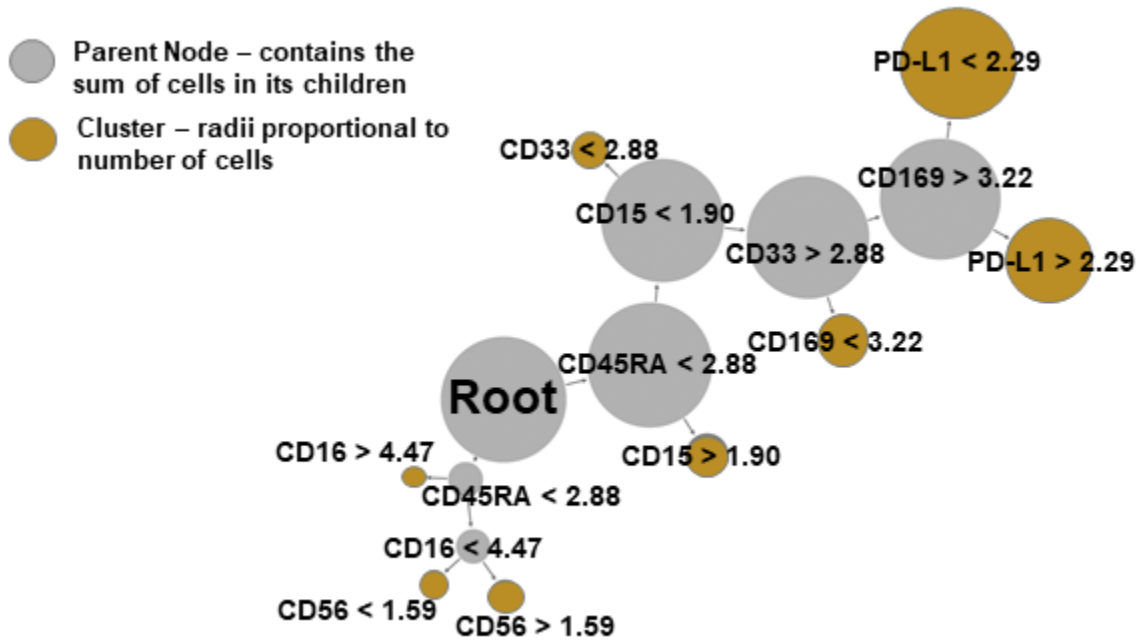

**Unsupervised Clustering Identifies Novel Alveolar Myeloid Subtypes.** Divisive Marker Tree (DMT) dendrogram displaying the eight myeloid clusters derived by  $\kappa$ NN-DE clustering ( $\kappa$  nearest neighbors = 30) of alveolar myeloid cells after exclusion of CD3<sup>+</sup> T cells and CD206<sup>low</sup>CD14<sup>high</sup> MONOs. The DMT starts with the Root node encompassing all clusters, then progresses through successive binary divisions that are chosen to maximize the average uncentered Pearson correlation of each of the cluster expression profiles. For each division, the marker that has the largest variance-normalized difference between the two sister clusters is labeled along with the cut-off value.

Figure S4.

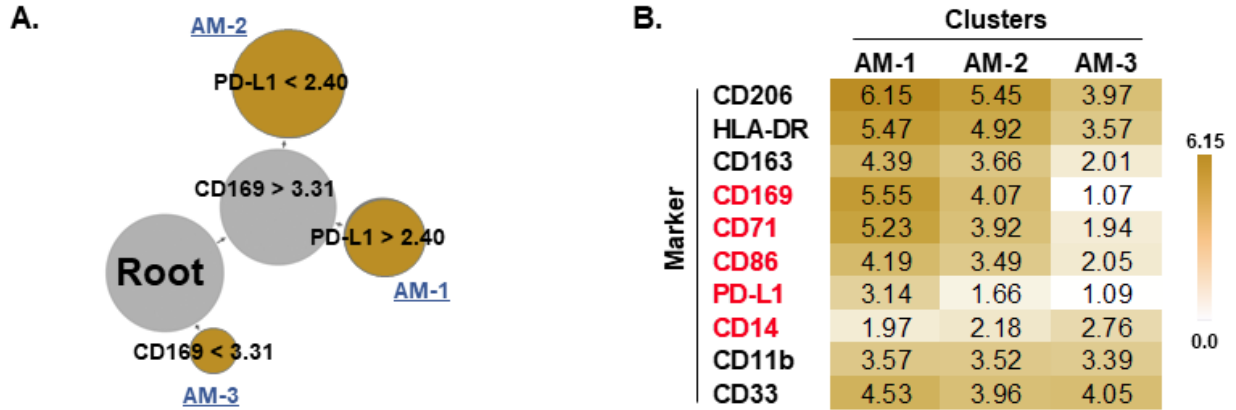

**Unsupervised Clustering of CD33<sup>+</sup>CD71<sup>+</sup>CD163<sup>+</sup> AMs Validates the Presence of Alveolar Myeloid Subtypes.** A) Divisive Marker Tree (DMT) dendrogram displaying the three AM clusters derived by  $\kappa$ NN-DE clustering ( $\kappa$  nearest neighbors = 30) of CD33<sup>+</sup>/CD71<sup>+</sup>/CD163<sup>+</sup>AMs. B) Heatmap displaying the median marker intensities (asinh(marker intensity/5) scale) of the most informative markers for each subtype identified and displayed in panel A. The markers colored in red were carried forward for further analysis.

Figure S5.

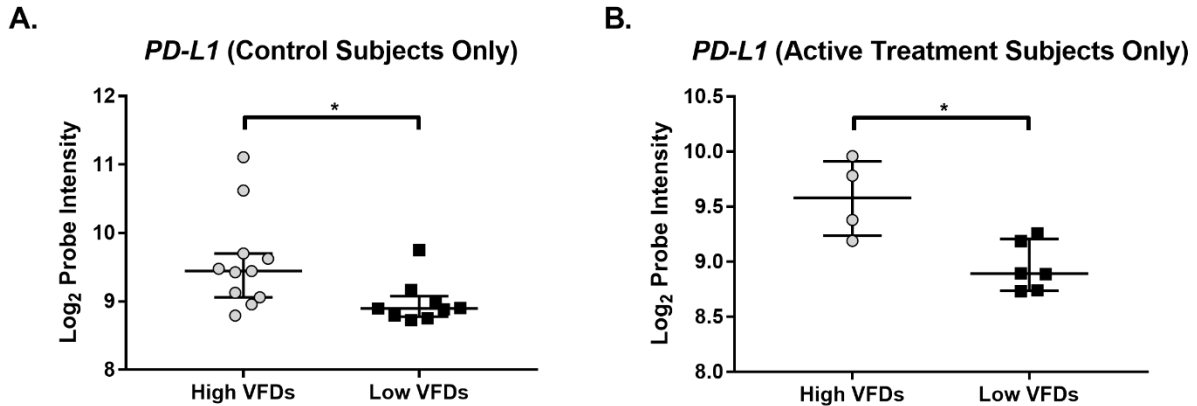

**AM *PD-L1* Gene Expression is Associated with Ventilator-Free Days (VFDs) in Subjects with ARDS Treated with Placebo or Fish Oil.** AM gene expression was measured by microarray analysis from a cohort of patients enrolled in a randomized controlled trial comparing subjects treated with placebo versus fish oil (ARDS-AMGE) < 48 hours after ARDS onset. A) AM expression of *PD-L1* in subjects randomized to the placebo group (High VFDs:  $n = 11$  versus Low VFDs:  $n = 9$ ). B) AM expression of *PD-L1* in subjects randomized to the active drug (fish oil) group (High VFDs:  $n = 4$  versus Low VFDs:  $n = 6$ ). High VFDs = VFD  $\geq 18$  and Low VFDs = VFD < 18. mRNA normalized log<sub>2</sub> probe intensity for each transcript is expressed as individual values and median  $\pm$  IQR for each group. For each gene, comparisons were made with a Mann-Whitney test. \* =  $p < 0.05$

Figure S6.

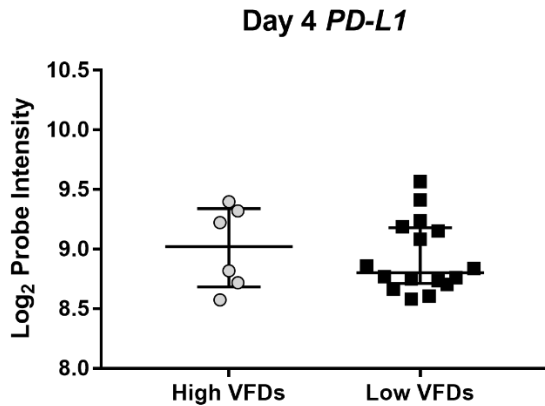

**Day 4 Alveolar Macrophage (AM) PD-L1 Gene Expression is not Associated with Ventilator-Free Days (VFDs) in Subjects with ARDS.** AM gene expression was measured in a cohort of patients enrolled in a randomized controlled trial comparing subjects treated with fish oil versus placebo (ARDS-AMGE). Samples used in this analysis were collected on Day 4 after ARDS onset. High VFDs = VFD  $\geq$  18 ( $n = 6$ ) and Low VFDs = VFD  $<$  18 ( $n = 16$ ). mRNA normalized  $\log_2$  probe intensity for each transcript is expressed as individual values and median  $\pm$  IQR for each group.  $p = 0.75$  comparing the medians between High and Low VFDs using a Mann-Whitney test.

**Figure S7.**

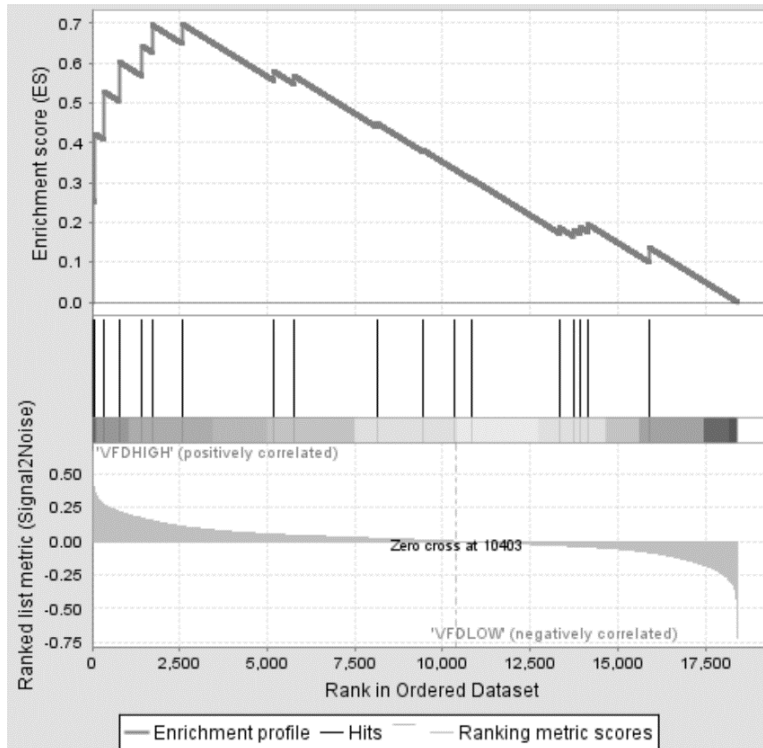

**The REACTOME\_PD1\_SIGNALING Gene Set is Enriched in Alveolar Macrophages from High Ventilator-Free Day (High VFD) Compared with Low VFD Subjects in Acute Respiratory Distress Syndrome (ARDS).** Each vertical line in the middle portion of the plot represents one of the probes in the REACTOME\_PD1\_SIGNALING gene set. The left-to-right position of each line indicates the relative position of the probe within the rank ordering of the 18,415 probes on the microarray based on the most upregulated probe in the High VFD (High VFD = VFD  $\geq$  18,  $n = 15$ ) versus Low VFD (VFD Low = VFD  $<$  18,  $n = 15$ ) group. The top portion of the plot shows the running enrichment score (ES) as the analysis proceeds along the entire transcriptome. The ES reflects the degree in which each gene from the gene set is overrepresented or underrepresented along the entire transcriptome. The bottom portion of the plot displays the ranked list metric along the entire transcriptome, which reflects the degree of a gene's correlation with a phenotype. The REACTOME\_PD1\_SIGNALING gene set is enriched in High VFD compared with Low VFD subjects as evidenced by the increased number of black lines on the left side of the plot and the positive enrichment score marked by the ES line ( $p < 0.001$ ). Plot was generated with GSEA (<http://software.broadinstitute.org/gsea/index.jsp>).



## Supplemental Tables

**Table S1. CyTOF Marker Panel**

| TARGET         | CLONE          | LABEL | VENDOR   |
|----------------|----------------|-------|----------|
| IL-1R          | Polyclonal     | 166Er | FDM      |
| CD3            | UCHT1          | 154Sm | FDM      |
| CD4            | RPA-T4         | 145Nd | FDM      |
| CD8A           | RPA-T8         | 162Dy | FDM      |
| CD11B (MAC-1)  | ICRF44         | 167Er | FDM      |
| CD11C          | Bu15           | 147Sm | FDM      |
| CD14           | M5E2           | 151Eu | FDM      |
| CD15 (SSEA-1)  | W6D3           | 164Dy | FDM      |
| CD16           | 3G8            | 209Bi | FDM      |
| CD19           | HIB19          | 142Nd | FDM      |
| CD25 (IL-2R)   | BC96           | 159Tb | In-house |
| CD33           | WM53           | 169Tm | FDM      |
| CD38           | HIT2           | 144Nd | FDM      |
| CD45           | HI30           | 89Y   | FDM      |
| CD45RA         | HI100          | 143Nd | FDM      |
| CD54           | HA58           | 170Er | FDM      |
| CD56 (NCAM)    | NCAM16.2       | 149Sm | FDM      |
| CD71           | OKT-9          | 175Lu | FDM      |
| CD80 (B7-1)    | 2D10.4         | 161Dy | FDM      |
| CD86           | IT2.2          | 150Nd | FDM      |
| CD103          | Ber-ACT8       | 160Gd | In-house |
| CD123 (IL-3R)  | 6H6            | 153Eu | In-house |
| CD127 (IL-7RA) | A019D5         | 172Yb | In-house |
| CD163          | GHI/61         | 165Ho | FDM      |
| CD169          | 7-239          | 158Gd | FDM      |
| CD183 (CXCR3)  | G025H7         | 156Gd | FDM      |
| CD194 (CCR4)   | 205410         | 173Yb | In-house |
| CD196 (CCR6)   | G034E3         | 141Pr | FDM      |
| CD197 (CCR7)   | G043H7         | 152Sm | In-house |
| CD206 (MMR)    | 15-2           | 168Er | FDM      |
| CD274 (PD-L1)  | 29E.2A3        | 148Nd | FDM      |
| CD279 (PD-1)   | EH12.2H7       | 155Gd | FDM      |
| CD294 (CRTH2)  | BM16           | 163Dy | FDM      |
| FCERI          | AER-37 (CRA-1) | 171Yb | In-house |
| HLA-DR         | L243           | 174Yb | FDM      |
| SIGLEC 8       | 7C9            | 176Yb | In-house |

FDM: Fluidigm

**Table S2. All Median Myeloid Marker Intensities for Each Subtype Identified by  $\kappa$ NN-DE in HMC-BAL.**

| Marker   | Clusters |      |      |      |      |          |      |      |  |
|----------|----------|------|------|------|------|----------|------|------|--|
|          | AM-1     | AM-2 | AM-3 | UNK  | PMN  | NK cells | pDC  | cDC  |  |
| CD206    | 6.08     | 5.27 | 4.17 | 1.77 | 1.79 | 0.67     | 0.90 | 1.03 |  |
| HLA-DR   | 5.38     | 4.78 | 3.64 | 1.59 | 1.40 | 0.76     | 3.42 | 2.62 |  |
| CD163    | 4.33     | 3.35 | 1.76 | 0.90 | 1.38 | 0.55     | 0.40 | 0.93 |  |
| CD169    | 5.50     | 3.91 | 0.95 | 1.82 | 1.28 | 0.55     | 1.13 | 2.66 |  |
| CD71     | 5.16     | 3.72 | 1.87 | 0.94 | 1.39 | 0.93     | 2.07 | 1.16 |  |
| CD86     | 4.13     | 3.36 | 2.18 | 0.83 | 0.61 | 0.91     | 0.74 | 0.62 |  |
| PD-L1    | 3.05     | 1.54 | 1.09 | 0.57 | 0.44 | 0.61     | 0.48 | 0.63 |  |
| CD14     | 1.95     | 2.08 | 3.09 | 0.35 | 0.40 | 0.25     | 0.44 | 0.26 |  |
| CD11b    | 3.49     | 3.35 | 3.55 | 0.56 | 2.96 | 0.52     | 0.52 | 1.13 |  |
| CD15     | 1.81     | 1.41 | 0.94 | 0.43 | 3.36 | 0.48     | 0.49 | 0.48 |  |
| CD56     | 1.20     | 0.78 | 0.66 | 0.41 | 0.19 | 2.96     | 0.22 | 0.55 |  |
| CD123    | 3.64     | 4.44 | 2.59 | 1.08 | 1.07 | 0.39     | 1.56 | 0.96 |  |
| CD45RA   | 1.35     | 0.90 | 0.98 | 0.67 | 0.62 | 3.78     | 4.80 | 5.14 |  |
| CCR6     | 2.53     | 1.82 | 0.99 | 1.14 | 2.14 | 0.54     | 2.46 | 8.25 |  |
| CD33     | 4.43     | 3.80 | 4.11 | 1.34 | 1.44 | 0.62     | 1.11 | 0.98 |  |
| CD45     | 4.03     | 3.42 | 3.77 | 3.47 | 3.06 | 3.12     | 3.69 | 3.25 |  |
| CD54     | 3.99     | 3.88 | 4.36 | 1.48 | 1.56 | 1.47     | 2.76 | 1.00 |  |
| CCR4     | 3.00     | 2.77 | 2.22 | 0.84 | 0.93 | 0.35     | 1.78 | 1.21 |  |
| CD38     | 2.69     | 1.92 | 2.44 | 0.90 | 0.71 | 2.55     | 2.88 | 2.16 |  |
| CD4      | 2.64     | 1.92 | 1.59 | 1.20 | 0.32 | 0.60     | 0.93 | 1.32 |  |
| CD11c    | 2.72     | 2.55 | 2.89 | 0.70 | 1.13 | 0.49     | 0.77 | 1.10 |  |
| IL-1R    | 2.93     | 2.50 | 2.25 | 0.58 | 2.04 | 0.47     | 0.58 | 2.57 |  |
| CD16     | 2.47     | 2.39 | 1.29 | 1.28 | 3.07 | 2.34     | 0.88 | 8.05 |  |
| CD25     | 2.55     | 1.55 | 0.54 | 0.72 | 0.90 | 1.16     | 1.88 | 1.86 |  |
| CXCR3    | 2.31     | 1.48 | 0.97 | 1.46 | 1.19 | 0.88     | 1.49 | 1.80 |  |
| Siglec-8 | 2.41     | 1.59 | 0.84 | 0.48 | 0.70 | 0.38     | 0.70 | 0.78 |  |
| CD80     | 2.10     | 1.31 | 0.76 | 0.76 | 0.67 | 0.44     | 0.71 | 0.54 |  |
| CD103    | 2.30     | 1.82 | 0.99 | 1.34 | 1.17 | 0.98     | 0.98 | 0.83 |  |
| FceR1a   | 1.56     | 1.70 | 2.06 | 0.56 | 0.69 | 0.40     | 1.07 | 0.63 |  |
| CCR7     | 1.19     | 1.89 | 1.48 | 0.40 | 1.04 | 0.33     | 1.51 | 0.35 |  |
| CD3      | 1.35     | 1.92 | 0.84 | 1.35 | 0.33 | 0.28     | 0.63 | 0.19 |  |
| CD8      | 1.00     | 0.94 | 0.87 | 0.63 | 0.53 | 0.73     | 0.25 | 0.35 |  |
| CD127    | 1.53     | 1.44 | 1.29 | 0.93 | 0.53 | 0.34     | 0.69 | 0.34 |  |
| CRTH2    | 1.26     | 0.81 | 0.58 | 0.38 | 1.57 | 0.33     | 0.30 | 0.42 |  |
| PD-1     | 0.95     | 0.88 | 0.42 | 0.94 | 0.36 | 0.26     | 0.46 | 0.33 |  |

All values are expressed on the  $\text{asinh}(\text{raw intensity}/5)$  scale; AM = alveolar macrophage, cDC = conventional dendritic cell, NK = natural killer cell, pDC = plasmacytoid dendritic cell, PMN = neutrophil, UNK = unclassified
